# Supplementary material for: Accuracy of parent-reported information for estimating prevalence of overweight and obesity in a race-ethnically diverse pediatric clinic population aged 3 to 12
Source: PubMed Central journal article supplement (PMC4341231; doi:10.1186/s12887-015-0320-0), 2015-02-12
Supplement: 12887_2015_320_MOESM1_ESM.pdf [file 12887_2015_320_MOESM1_ESM.pdf]

## PARENT SURVEY ABOUT CHILD'S HEIGHT AND WEIGHT

Kaiser Permanente's Division of Research is doing a study to learn how accurate parents are when they are asked to report their child's height and weight in surveys and to medical staff during phone consults.

We hope you will agree to fill out this questionnaire. When you are done, you will receive a small gift to thank you for your help. We will link your answers about your child's height and weight to the height and weight measured by the medical assistant today. All of this information will be kept confidential.

You do not need to answer these questions if you do not want to. If you decide not to, neither your child's medical care nor Health Plan benefits will be affected.

- 1) How old is your child? \_\_\_\_\_ **Child's MRN:** \_\_\_\_\_
- 2) Is your child a:  Boy  Girl
- 3) How tall is your child (without shoes)?  
 \_\_\_\_\_ feet \_\_\_\_\_ inches **OR** \_\_\_\_\_ meters \_\_\_\_\_ cm **OR**  Don't know
- 4) How much does your child weigh (without shoes)?  
 \_\_\_\_\_ pounds **OR** \_\_\_\_\_ kilograms \_\_\_\_\_ grams **OR**  Don't Know
- 5) How confident are you that your answers about your child's height and weight are correct?  
 a. Height:  Very confident  Fairly confident  Not confident  
 b. Weight:  Very confident  Fairly confident  Not confident
- 6) When was the last time you found out your child's height?  
 In the past 7 days  In the past month  In the past 6 months  More than 6 months ago
- 7) Do you think your child has grown taller since the last time he/she was measured?  
 No taller  A little bit taller  A lot taller
- 8) When was the last time you found out your child's weight?  
 In the past 7 days  In the past month  In the past 6 months  More than 6 months ago
- 9) Do you think your child is:  
 Underweight  About the right weight  Overweight  Very Overweight
- 10) Do you have a scale at your home that could be used to weigh your child if you were asked to do so?  
 Yes  No
- 11) Do you have a tape measure or yardstick at your home that could be used to measure your child's height if you were asked to do so?  
 Yes  No
- 12) What size jeans or uniform/dress pants does your child currently wear? *(Circle your answer)*  
 2T 3T 4T 5T 4 5 6 7 8 9 10 12 14 16 18 20  
 Is this size:  Regular  Slim  Husky
- 13) Who completed this questionnaire?  
 Mother  Father  Other: \_\_\_\_\_
